# Supplementary material
Source: PubMed Central journal article supplement (PMC2735869)
Supplement: NIHMS113459-supplement-Suppl_Figs.pdf [file NIHMS113459-supplement-Suppl_Figs.pdf]

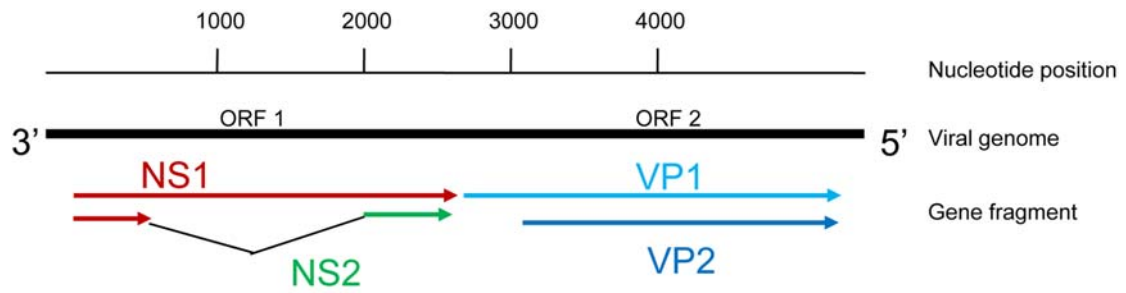

**Supplementary Figure S1.** Diagram of the parvovirus genome. The open reading frames, encoded proteins and nucleotide positions are indicated.

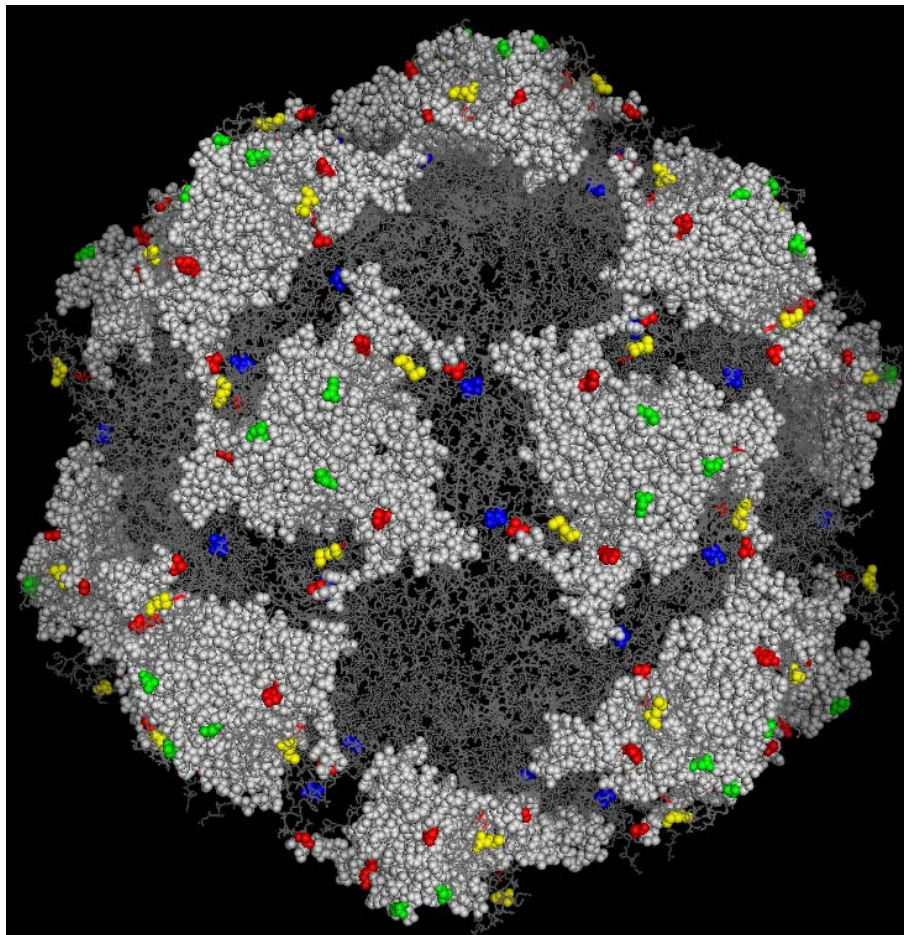

**Supplementary Figure S2.** Positively selected capsid protein residues mapped onto the crystal structure of the CPV half capsid. Residues positively selected among FPV and CPV (residues 101, 300 and 324) are shown in red, residue positively selected only among FPV sequences (residue 562) is shown in blue, and residues positively selected only among CPV sequences (residue 87) is shown in yellow. Residue 426 is shown in green.
