# Supplementary material
Source: PubMed Central journal article supplement (PMC2735869)
Supplement: NIHMS113459-supplement-Suppl_Tables.pdf [file NIHMS113459-supplement-Suppl_Tables.pdf]

1 **Supplementary Tables.**

2 **Supplementary Table 1.** List of full-length sequences analyzed here. The viral clade,  
 3 sequence name and GenBank number are shown. Where applicable, information on the year  
 4 and place of isolation are provided.

| name                  | GenBank number | isolation date | isolation location |
|-----------------------|----------------|----------------|--------------------|
| FPV                   |                |                |                    |
| FPLV-XJ-1.ch          | EF988660       | -              | China              |
| FPV-193.au_70         | X55115         | 1970           | Australia          |
| MEV-Aba.ja_78         | D00765         | 1978           | Japan              |
| FPV-b.us_67           | M38246         | 1967           | US                 |
| FPV-3.us_67           | EU659111*      | 1967           | US                 |
| FPV-4.us_64           | EU659112*      | 1964           | US                 |
| FPV-8a.us_89          | EU659113*      | 1989           | US                 |
| FPV-8b.us_89          | EU659114*      | 1989           | US                 |
| FPV_kai.us_06         | EU659115*      | 2006           | US                 |
| CPV-2                 |                |                |                    |
| CPV-pD8               | NC_001539      | -              | -                  |
| CPV-bM38245           | M38245         | -              | -                  |
| CPV-N.us_78           | M19296         | 1978           | US                 |
| CPV-5.us_79           | EU659116*      | 1979           | US                 |
| CPV-6.us_80           | EU659117*      | 1980           | US                 |
| CPV-2abc              |                |                |                    |
| CPVB-2004.ch_104'     | EF011664       | 2004           | China              |
| CPV-395.us_98         | AY742936       | 1998           | US                 |
| CPV-U6.ge_95          | AY742935       | 1995           | Germany            |
| CPV-447.ge_95         | AY742934       | 1995           | Germany            |
| CPV-339.nz_94         | AY742933       | 1994           | New Zealand        |
| CPV-193.us_91         | AY742932       | 1991           | US                 |
| CPV-AJ564427.in       | AJ564427       | -              | Northern India     |
| CPV-Y1.ja_82          | D26079         | 1982           | Japan              |
| CPV-cpv/nj01/06.ch.06 | EU310373       | 2006           | China              |
| CPV-13.us_81          | EU659118*      | 1981           | US                 |
| CPV-410.us_100        | EU659119*      | 2000           | US                 |
| CPV-411a.us_98        | EU659120*      | 1998           | US                 |
| CPV-411b.us_98        | EU659121*      | 1998           | US                 |

5 - not available,

6 \* determined in this study

7

7 **Supplementary Table 2.** List of NS1 sequences used here. The viral clade, sequence name  
8 and GenBank number are shown. Where applicable, information on year and place of isolation  
9 is provided.

| name                    | GenBank number | isolation date | isolation location |
|-------------------------|----------------|----------------|--------------------|
| FPV                     |                |                |                    |
| FPLV-XJ-1.ch            | EF988660       | -              | China              |
| FPV-193.au_70           | X55115         | 1970           | Australia          |
| MEV-Aba.ja_78           | D00765         | 1978           | Japan              |
| FPV-b.us_67             | M38246         | 1967           | US                 |
| FPV-3.us_67             | EU659111*      | 1967           | US                 |
| FPV-4.us_64             | EU659112*      | 1964           | US                 |
| FPV-8a.us_89            | EU659113*      | 1989           | US                 |
| FPV-8b.us_89            | EU659114*      | 1989           | US                 |
| FPV_kai.us_06           | EU659115*      | 2006           | US                 |
| FPLV-PLI-IV.fr_68       | AB000057       | 1968           | France             |
| FPLV-<br>Obihiro_ja_74  | AB000055       | 1974           | Japan (Hokkaido)   |
| FPLV-TU2_ja_75          | AB000065       | 1975           | Japan (Tokyo)      |
| FPLV-TU4_ja_75          | AB000067       | 1975           | Japan (Tokyo)      |
| FPLV-TU8_ja_76          | AB000069       | 1976.5         | Japan (Tokyo)      |
| MEV-<br>Abashiri_ja_78  | D00765         | 1978           | Japan              |
| FPLV-TU10_ja_79         | AB000062       | 1979           | Japan (Tokyo)      |
| FPLV-TU12_ja_79         | AB000063       | 1979           | Japan (Tokyo)      |
| FPLV-483_ja_90          | AB000048       | 1990           | Japan (Hokkaido)   |
| FPLV-<br>Fukagawa_ja_93 | AB000053       | 1993           | Japan (Fukushima)  |
| FPLV-941_ja_94          | AB000049       | 1994           | Japan (Tottori)    |
| FPLV-AO1_ja_94          | AB000051       | 1994           | Japan (Hokkaido)   |
| FPLV-<br>Som1_ja_94     | AB000058       | 1994           | Japan (Nara)       |
| FPLV-<br>Som4_ja_94     | AB000060       | 1995           | Japan (Saitama)    |
| CPV-2                   |                |                |                    |
| CPV-pD8                 | NC_001539      | -              | -                  |
| CPV-bM38245             | M38245         | -              | -                  |
| CPV-N.us_78             | M19296         | 1978           | US                 |
| CPV-5.us_79             | EU659116*      | 1979           | US                 |
| CPV-6.us_80             | EU659117*      | 1980           | US                 |
| CPV-d.us_79             | M38245         | 1979           | US                 |
| CPV-2abc                |                |                |                    |
| CPVB-<br>2004.ch_104'   | EF011664       | 2004           | China              |
| CPV-395.us_98           | AY742936       | 1998           | US                 |
| CPV-U6.ge_95            | AY742935       | 1995           | Germany            |
| CPV-447.ge_95           | AY742934       | 1995           | Germany            |
| CPV-339.nz_94           | AY742933       | 1994           | New Zealand        |
| CPV-193.us_91           | AY742932       | 1991           | US                 |

|                           |           |      |                |
|---------------------------|-----------|------|----------------|
| CPV-AJ564427.in           | AJ564427  | -    | Northern India |
| CPV-Y1.ja_82              | D26079    | 1982 | Japan          |
| CPV-<br>cpv/nj01/06.ch.06 | EU310373  | 2006 | China          |
| CPV-13.us_81              | EU659118* | 1981 | US             |
| CPV-410.us_100            | EU659119* | 2000 | US             |
| CPV-411a.us_98            | EU659120* | 1998 | US             |
| CPv-411b.us_98            | EU659121* | 1998 | US             |
| CPV-31.us_83              | AY787929  | 1983 | US             |
| CPV-15.us_84              | AY787926  | 1984 | US             |
| CPV-39.us_84              | AY787930  | 1984 | US             |
| CPV-24.us_90              | AY787928  | 1990 | US             |
| CPV-133.us_90             | M74852    | 1990 | US             |
| CPV-402.us_98             | AY742946  | 1998 | US             |
| CPV-407.us_98             | AY742950  | 1999 | US             |
| CPV-412.us_98             | AY742948  | 1998 | US             |
| CPV-431.us_103            | AY742952  | 2003 | US             |
| CPV-435.us_103            | AY742954  | 2003 | US             |
| CPV-436.us_104            | AY742956  | 2004 | US             |

10 - not available,

11 \* determined in this study.

12

12 **Supplementary Table 3.** List of VP2 sequences used here. The viral clade, sequence name  
 13 and GenBank number are shown. Where applicable, information on year and place of isolation  
 14 are provided.

| name                   | GenBank number | isolation date | isolation location |
|------------------------|----------------|----------------|--------------------|
| <b>FPV</b>             |                |                |                    |
| BFPV.fi_83             | U22185         | 1983           | Finland            |
| FPLV/Lion/PT06.pt_106  | EF418569       | 2006           | Portugal           |
| FPLV/Tiger/PT06.pt_106 | EF418568       | 2006           | Portugal           |
| FPLV-483.ja_90         | D88286         | 1990           | Japan              |
| FPLV-941.ja_94         | AB000050       | 1994           | Japan              |
| FPLV-A04.ja_94         | AB000052       | 1994           | Japan              |
| FPLV-ARG01.ar          | EU018145       | -              | Argentina          |
| FPLV-ARG02.ar          | EU018144       | -              | Argentina          |
| FPLV-ARG03.ar          | EU018143       | -              | Argentina          |
| FPLV-ARG04.ar          | EU018142       | -              | Argentina          |
| FPLVb-CU4              | M24004         | -              | -                  |
| FPLV-fk.ja_93          | AB000054       | 1993           | Japan              |
| FPLV-Gercules-Biocentr | AY665655       | -              | -                  |
| FPLV-JF-3              | DQ099431       | -              | -                  |
| FPLV-obi.ja_74         | AB000056       | 1974           | Japan              |
| FPLV-pliIV.fr_68       | D88287         | 1968           | France             |
| FPLV-Som1.ja_94        | AB000059       | 1994           | Japan              |
| FPLV-Som4.ja_95        | AB000061       | 1995           | Japan              |
| FPLV-tu10.ja_79        | D78584         | 1979           | Japan              |
| FPLV-tu12.ja_79        | AB000064       | 1979           | Japan              |
| FPLV-tu2.ja_75         | AB000066       | 1975           | Japan              |
| FPLV-tu4.ja_75         | AB000068       | 1975           | Japan              |
| FPLV-tu8.ja_76.5       | AB000070       | 1976.5         | Japan              |
| FPLV-V142              | AB054225       | -              | -                  |
| FPLV-V208              | AB054226       | -              | -                  |
| FPLV-V211              | AB054227       | -              | -                  |
| FPLV-XJ-1.ch           | EF988660       | -              | China              |
| FPLV-ZF-5              | DQ099430       | -              | -                  |
| FPV-193.au_70          | X55115         | 1970           | Australia          |
| FPV-23.us_90           | U22187         | 1990           | USA                |
| FPV-377.ge_93          | U22188         | 1993           | Germany            |
| FPV-a.uk_62            | M24002         | 1962           | United Kingdom     |
| FPV-T1                 | AF015223       | -              | -                  |
| MEV-a.us_73            | M23999         | 1973           | USA                |
| MEV-Aba.ja_78          | D00765         | 1978           | Japan              |
| MEV-b.us_75            | M24001         | 1975           | USA                |
| MEV-Beregovoj-Biocentr | AY665656       | -              | -                  |
| MEV-Cherepanovo98      | AF201477       | -              | -                  |
| MEV-d.uk_65            | U22190         | 1965           | United Kingdom     |
| MEV-EF428258           | EF428258       | -              | -                  |
| MEV-EU137663           | EU137663       | -              | -                  |

|                      |           |      |         |
|----------------------|-----------|------|---------|
| MEV-Rodniki-Biocentr | AY665657  | -    | -       |
| RPV.us_79            | M24005    | 1979 | USA     |
| FPV-3.us_67          | EU659111* | 1967 | USA     |
| FPV-4.us_64          | EU659112* | 1964 | USA     |
| FPV-8a.us_89         | EU659113* | 1989 | USA     |
| FPV-8b.us_89         | EU659114* | 1989 | USA     |
| FPV_kai.us_106       | EU659115* | 2006 | USA     |
| <b>CPV-2</b>         |           |      |         |
| CPV-RD87.fi_87       | U22193    | 1987 | Finland |
| CPV-dCornell320      | M23255    | -    | -       |
| CPV-128.us_78        | U22186    | 1978 | USA     |
| CPV-RD80.fi_80       | U22192    | 1980 | Finland |
| CPV-pD8              | NC_001539 | -    | -       |
| CPV-N.us_78          | M19296    | 1978 | USA     |
| CPV-AJ698134.in      | AJ698134  | -    | India   |
| CPV-M10989           | M10989    | -    | -       |
| CPV-5.us_79          | EU659116* | 1979 | USA     |
| CPV-6.us_80          | EU659117* | 1980 | USA     |
| <b>CPV-2a</b>        |           |      |         |
| BR133.br_94          | DQ340427  | 1994 | Brazil  |
| BR135.br_80          | DQ340405  | 1980 | Brazil  |
| BR136.br_93          | DQ340423  | 1993 | Brazil  |
| BR137.br_80          | DQ340406  | 1980 | Brazil  |
| BR137.br_93          | DQ340424  | 1993 | Brazil  |
| BR145.br_80          | DQ340407  | 1980 | Brazil  |
| BR154.br_80          | DQ340408  | 1980 | Brazil  |
| BR17.br_90           | DQ340412  | 1990 | Brazil  |
| BR18.br_90           | DQ340413  | 1990 | Brazil  |
| BR183.br_85          | DQ340409  | 1985 | Brazil  |
| BR209.br_94          | DQ340428  | 1994 | Brazil  |
| BR22.br_93           | DQ340422  | 1993 | Brazil  |
| BR227.br_93          | DQ340425  | 1993 | Brazil  |
| BR237.br_94          | DQ340429  | 1994 | Brazil  |
| BR31.br_90           | DQ340414  | 1990 | Brazil  |
| BR315.br_86          | DQ340410  | 1986 | Brazil  |
| BR43.br_91           | DQ340415  | 1990 | Brazil  |
| BR46.br_95           | DQ340430  | 1994 | Brazil  |
| BR47.br_91           | DQ340416  | 1991 | Brazil  |
| BR491.br_92          | DQ340418  | 1992 | Brazil  |
| BR52.br_91           | DQ340417  | 1991 | Brazil  |
| BR56.br_95           | DQ340431  | 1995 | Brazil  |
| BR570.br_92          | DQ340419  | 1992 | Brazil  |
| BR593.br_92          | DQ340420  | 1992 | Brazil  |
| BR597.br_92          | DQ340421  | 1992 | Brazil  |
| BR6.br_80            | DQ340404  | 1980 | Brazil  |
| BR62.br_95           | DQ340432  | 1995 | Brazil  |
| BR7168.br_100        | DQ340433  | 2000 | Brazil  |
| BR8.br_90            | DQ340411  | 1990 | Brazil  |
| BR8155.br_100        | DQ340434  | 2000 | Brazil  |
| BR84.br_94           | DQ340426  | 1994 | Brazil  |

|                   |          |      |                |
|-------------------|----------|------|----------------|
| CPV-133.us_90     | M74852   | 1990 | USA            |
| CPV-15.us_84      | M24003   | 1984 | USA            |
| CPV-193.us_91     | AY742932 | 1991 | USA            |
| CPV-209.vi_97     | AB054219 | 1997 | Vietnam        |
| CPV-24.us_90      | U22896   | 1990 | USA            |
| CPV2a-AJ564427.in | AJ564427 | -    | India          |
| CPV2a-APD1.ch     | EU213074 | -    | China          |
| CPV2a-BD2.ch      | EU213079 | -    | China          |
| CPV2a-BD3.ch      | EU213080 | -    | China          |
| CPV2a-BD4.ch      | EU213081 | -    | China          |
| CPV2a-BJ004/O7.ch | EF666059 | -    | China, Beijing |
| CPV2a-BJ005/O7.ch | EF666060 | -    | China, Beijing |
| CPV2a-BJ008/O7.ch | EF666061 | -    | China, Beijing |
| CPV2a-BJ010/O7.ch | EF666062 | -    | China, Beijing |
| CPV2a-BJ015/O7.ch | EF666063 | -    | China, Beijing |
| CPV2a-BJ017/O6.ch | EF666065 | -    | China, Beijing |
| CPV2a-BJ017/O7.ch | EF666064 | -    | China, Beijing |
| CPV2a-BJ018/O7.ch | EF666066 | -    | China, Beijing |
| CPV2a-BJ020/O7.ch | EF666067 | -    | China, Beijing |
| CPV2a-BJ027/O7.ch | EF666068 | -    | China, Beijing |
| CPV2a-BJ034/O7.ch | EU145953 | -    | China          |
| CPV2a-BJ042/O7.ch | EF666069 | -    | China, Beijing |
| CPV2a-BJ050/O7.ch | EU145955 | -    | China          |
| CPV2a-BJ064/O7.ch | EU145956 | -    | China          |
| CPV2a-BJ068/O7.ch | EU145957 | -    | China          |
| CPV2a-BJ069/O7.ch | EU145958 | -    | China          |
| CPV2a-BJ077/O7.ch | EU145959 | -    | China          |
| CPV2a-BJ082/O7.ch | EU145960 | -    | China          |
| CPV2a-BJ085/O7.ch | EU145961 | -    | China          |
| CPV2a-HT.ch       | EU213077 | -    | China          |
| CPV2a-HZ0761.ch   | EU213073 | -    | China          |
| CPV2a-JB1.ch      | EU213076 | -    | China          |
| CPV2a-K001.sk     | EU009200 | -    | South Korea    |
| CPV2a-K014.sk     | EU009201 | -    | South Korea    |
| CPV2a-K015.sk     | EU009202 | -    | South Korea    |
| CPV2a-K022.sk     | EU009203 | -    | South Korea    |
| CPV2a-K026.sk     | EU009204 | -    | South Korea    |
| CPV2a-KT1.ch      | EU213082 | -    | China          |
| CPV2a-KT2.ch      | EU213083 | -    | China          |
| CPV2a-NJ-04.ch    | EU095252 | -    | China, Beijing |
| CPV2a-Sho-nan     | AB128923 | -    | -              |
| CPV2a-ZD2.ch      | EU213084 | -    | China          |
| CPV2a-ZD3         | EU213085 | -    | -              |
| CPV2b-BD1.ch      | EU213075 | -    | China          |
| CPV2b-BJ044/O7.ch | EU145954 | -    | China          |
| CPV2b-HN-3.ch     | Q177497  | -    | China          |
| CPV2b-K029.sk     | EU009205 | -    | South Korea    |
| CPV2b-K031.sk     | EU009206 | -    | South Korea    |
| CPV2b-ZD1.ch      | EU213078 | -    | China          |
| CPV2c-Pome.sk     | EF599098 | -    | South Korea    |

|                    |          |      |             |
|--------------------|----------|------|-------------|
| CPV2-DQ903936.ch   | DQ903936 | -    | China       |
| CPV-31.us_83       | M24000   | 1983 | USA         |
| CPV-314.ja_93      | D78585   | 1993 | Japan       |
| CPV-339.nz_94      | AY742933 | 1994 | New Zealand |
| CPV-39.us_84       | M74849   | 1984 | USA         |
| CPV-395.us_98      | AY742936 | 1998 | USA         |
| CPV-431.us_103     | AY742951 | 2003 | USA         |
| CPV-435.us_103     | AY742953 | 2003 | USA         |
| CPV-436.us_104     | AY742955 | 2004 | USA         |
| CPV-447.ge_95      | AY742934 | 1995 | Germany     |
| CPV-46.po_94       | Z46651   | 1994 | Poland      |
| CPV-584.it_94      | AF306446 | 1994 | Italy       |
| CPV-616.it_95      | AF306449 | 1995 | Italy       |
| CPV-618.it_95      | AF306447 | 1995 | Italy       |
| CPV-632.it_96      | AF306445 | 1996 | Italy       |
| CPV-637.it_95      | AF306450 | 1995 | Italy       |
| CPV-677.it_98      | AF306448 | 1998 | Italy       |
| CPV-695.eu_99      | AF401519 | 1999 | Europe      |
| CPV-699.eu_100     | AF393506 | 2000 | Europe      |
| CPVB-2004.ch_104   | EF011664 | 2004 | China       |
| CPV-CPVKK0501      | EF189717 | -    | -           |
| CPV-DH326.sk       | EF599097 | -    | South Korea |
| CPV-DH426.sk       | EF599096 | -    | South Korea |
| CPV-1k.ja_97       | AB115504 | 1997 | Japan       |
| CPV-RPPV.ch_104    | DQ354068 | 2004 | China       |
| CPV-SHZ            | EU170352 | -    | China       |
| CPV-T10.ta_95      | U72696   | 1995 | Taiwan      |
| CPV-T25.ta_95      | U72697   | 1995 | Taiwan      |
| CPV-T37.ta_95      | U72698   | 1995 | Taiwan      |
| CPV-T4.ta_94       | U72695   | 1994 | Taiwan      |
| CPV-Ta9.ta_98      | AB054213 | 1998 | Taiwan      |
| CPV-TWN1.ta_106    | EF592511 | 2006 | Taiwan      |
| CPV-U6.ge_95       | AY742935 | 1995 | Germany     |
| CPV-V120.vi_97     | AB054215 | 1997 | Vietnam     |
| CPV-v123.vi_97     | AB054218 | 1997 | Vietnam     |
| CPV-v129.vi_97     | AB054216 | 1997 | Vietnam     |
| CPV-V139.vi_97     | AB054222 | 1997 | Vietnam     |
| CPV-V154.vi_97     | AB054217 | 1997 | Vietnam     |
| CPV-V203.vi_97     | AB054224 | 1997 | Vietnam     |
| CPV-V204           | AB054221 | -    | -           |
| CPV-v217.vi_97     | AB054220 | 1997 | Vietnam     |
| CPV-w42.it_95      | AF306444 | 1995 | Italy       |
| CPV-Y1.ja_82       | D26079   | 1982 | Japan       |
| HCM-18.ho.vi_102   | AB120722 | 2002 | Vietnam     |
| HCM-23.ho.vi_102   | AB120723 | 2002 | Vietnam     |
| HCM-6.ho.vi_102    | AB120720 | 2002 | Vietnam     |
| HCM-8.ho.vi_102    | AB120721 | 2002 | Vietnam     |
| HNI-1-18.ha.vi_102 | AB120728 | 2002 | Vietnam     |
| HNI-2-13.ha.vi_102 | AB120724 | 2002 | Vietnam     |
| HNI-3-11.ha.vi_102 | AB120726 | 2002 | Vietnam     |

|                        |           |      |         |
|------------------------|-----------|------|---------|
| HNI-3-4.ha.vi_102      | AB120725  | 2002 | Vietnam |
| HNI-4-1.ha.vi_102      | AB120727  | 2002 | Vietnam |
| LCPV-t1.ta_95          | AB054214  | 1995 | Taiwan  |
| LCPV-V140.vi_97        | AB054223  | 1997 | Vietnam |
| Taichung.ta_103        | AY869724  | 2003 | Taiwan  |
| CPV-13.us_81           | EU659118* | 1981 | USA     |
| CPV-410.us_100         | EU659119* | 2000 | USA     |
| CPV-411a.us_98         | EU659120* | 1998 | USA     |
| CPV-411b.us_98         | EU659121* | 1998 | USA     |
| CPV-cpv/nj01/06.ch_106 | EU310373  | 2006 | China   |

15 - not available,

16 \* determined in this study

17

18

19
